# Supplementary material
Source: PubMed Central journal article supplement (PMC3917989)

## **Supplemental Material to:**

**Mazhar Hussain, Scott L O'Neill, and Sassan Asgari**

**Wolbachia interferes with the intracellular distribution  
of Argonaute 1 in the dengue vector *Aedes aegypti* by  
manipulating the host microRNAs**

**2013; 10(12)**

**<http://dx.doi.org/10.4161/rna.27392>**

**[www.landesbioscience.com/journals/rnabiology/article/27392/](http://www.landesbioscience.com/journals/rnabiology/article/27392/)**

**Figure S1:** RT-qPCR analysis of -Wol Aag2 cells transfected with dsRNA specific to each importin gene. Control cells were transfected with dsRNA to GFP. Three biological and technical replicates were used for each treatment.

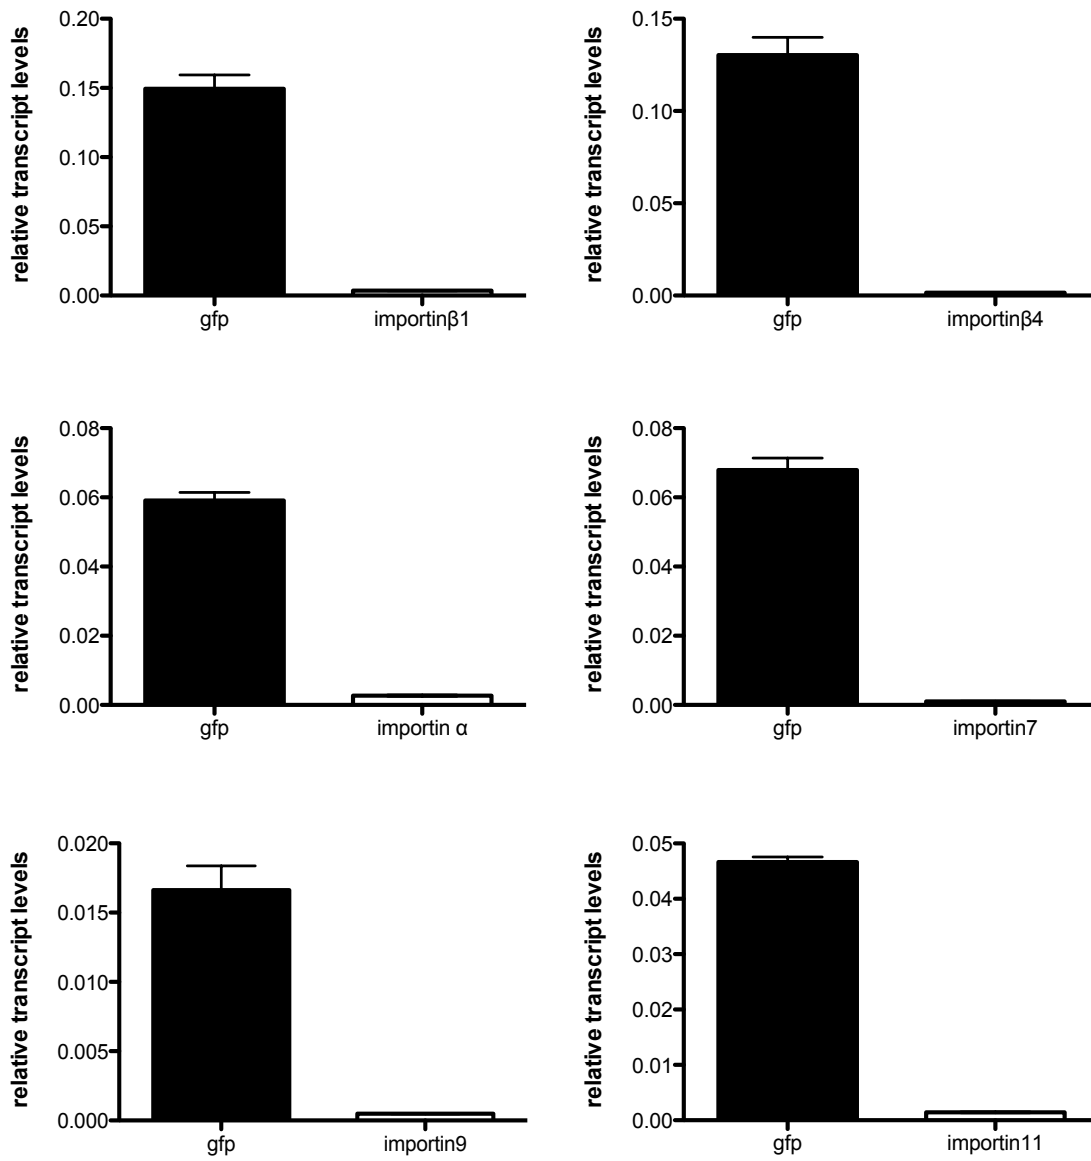

Supplement: rna-10-1868-s01.pdf [file rna-10-1868-s01.pdf]
